# Supplementary material
Source: Springer Nature journal article supplement (https://www.springermedizin.de/resource/supplementary/13048_2009_17_MOESM1_ESM.pdf/9664754)

**MOVCAR 1**

**MOVCAR 2**

**MOVCAR 9**

**MOVCAR 10**

**Muc16  
(520 bp)**

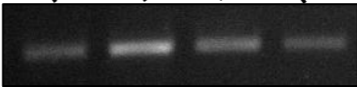

**GAPDH  
(602 bp)**

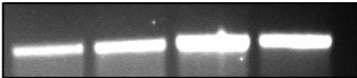

Supplement: MOESM1 [file 9664754]
